# Supplementary figures and images for: Gödel's Theorems for Minds and Computers.
Source: MDPI journal article supplement (doi:10.3390/ijms25094949), 1995-01-01

EDS Layered Image 5

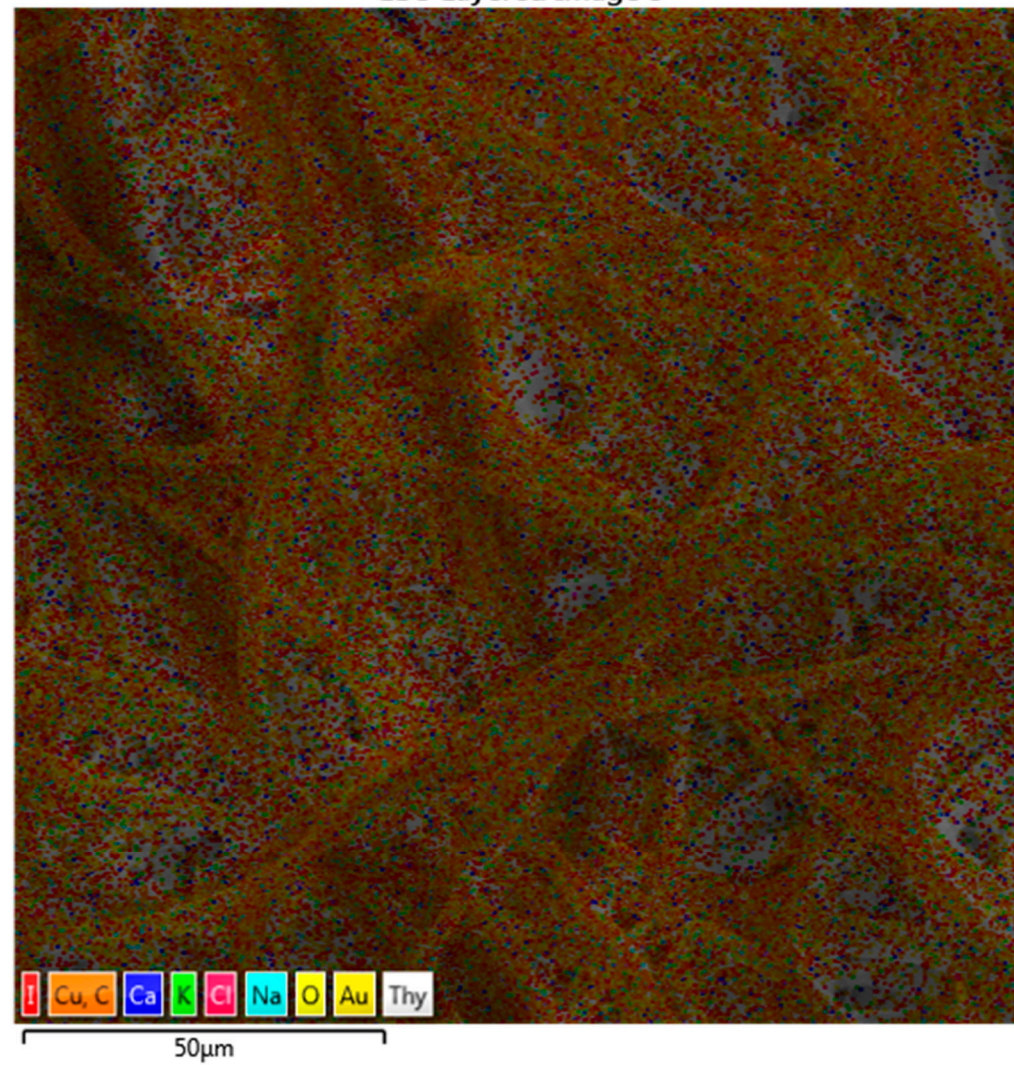

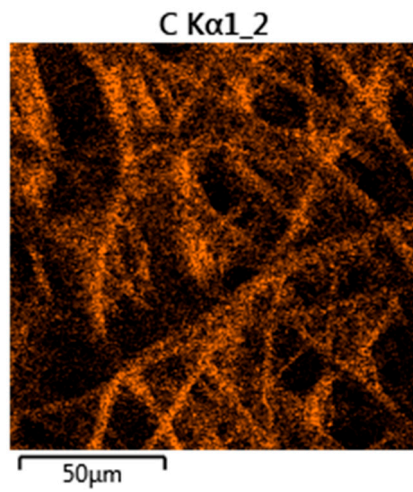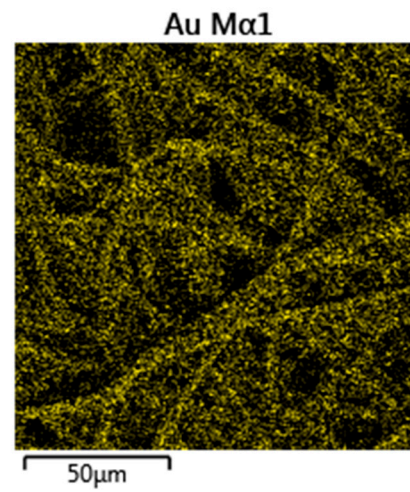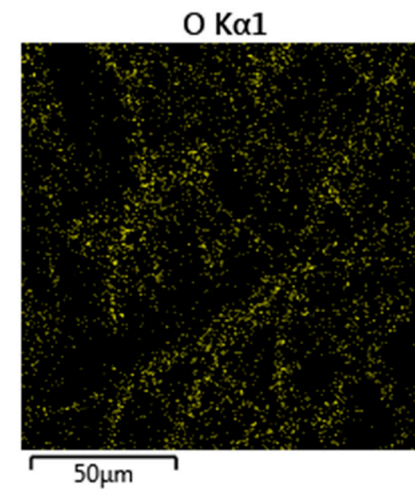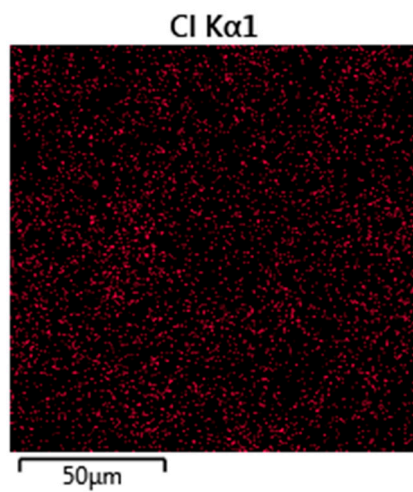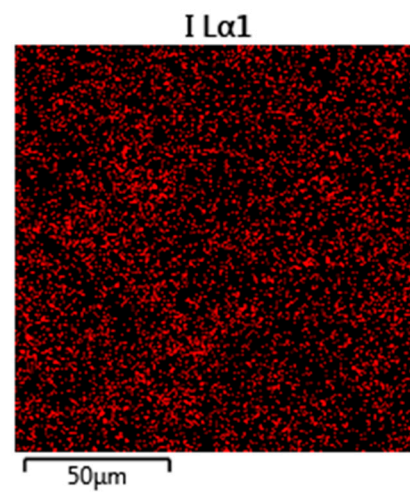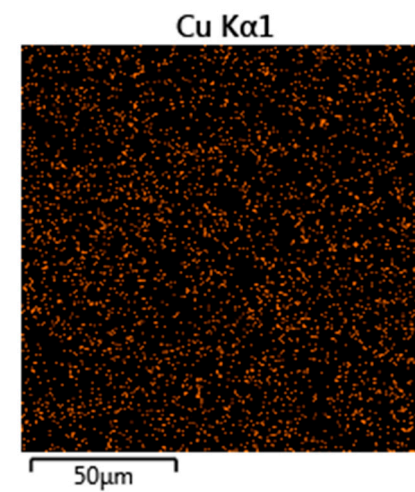

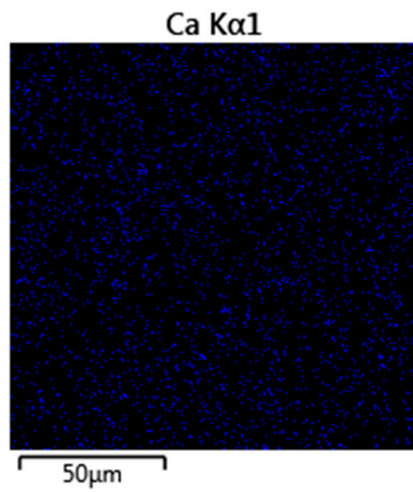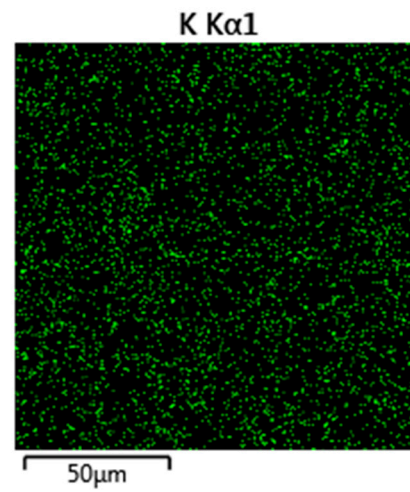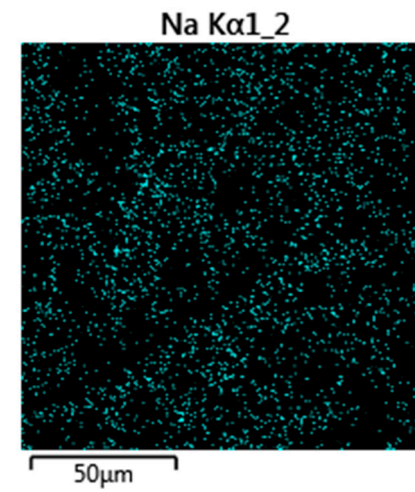

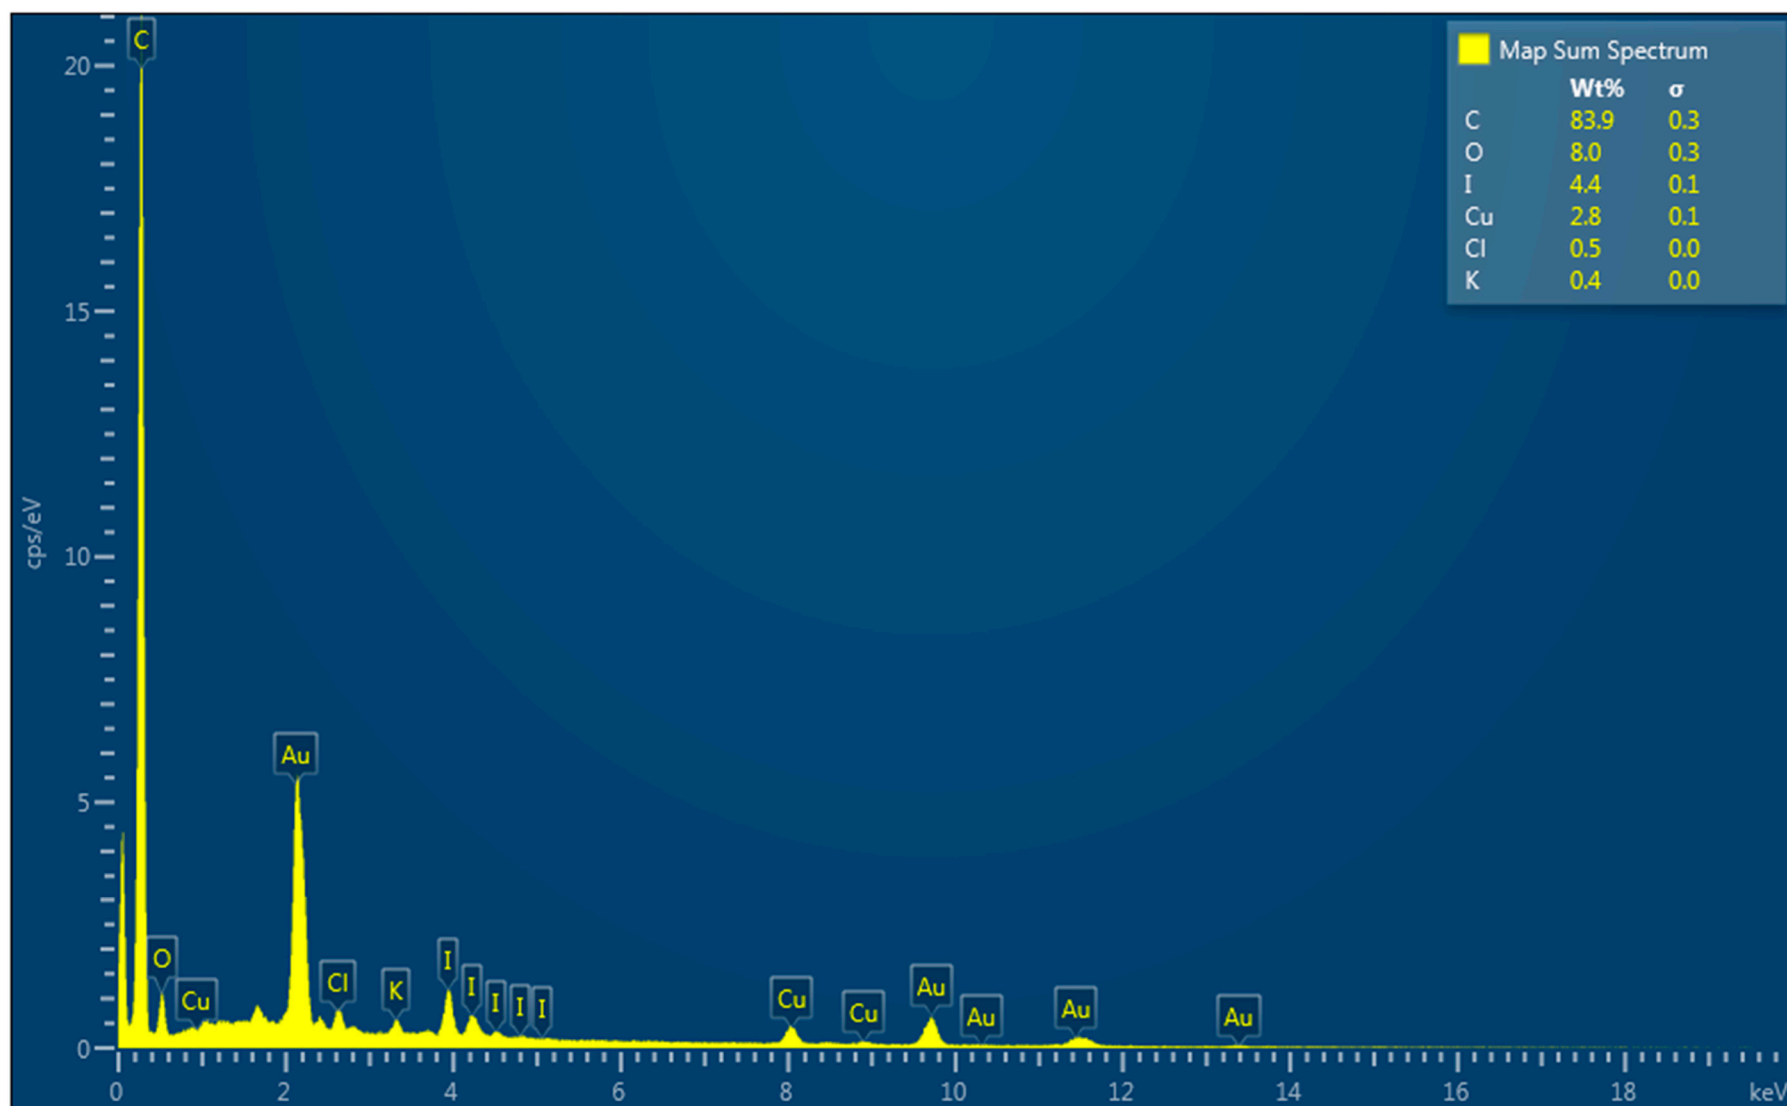

Supplement: s1 [file s1]

EDS Layered Image 7

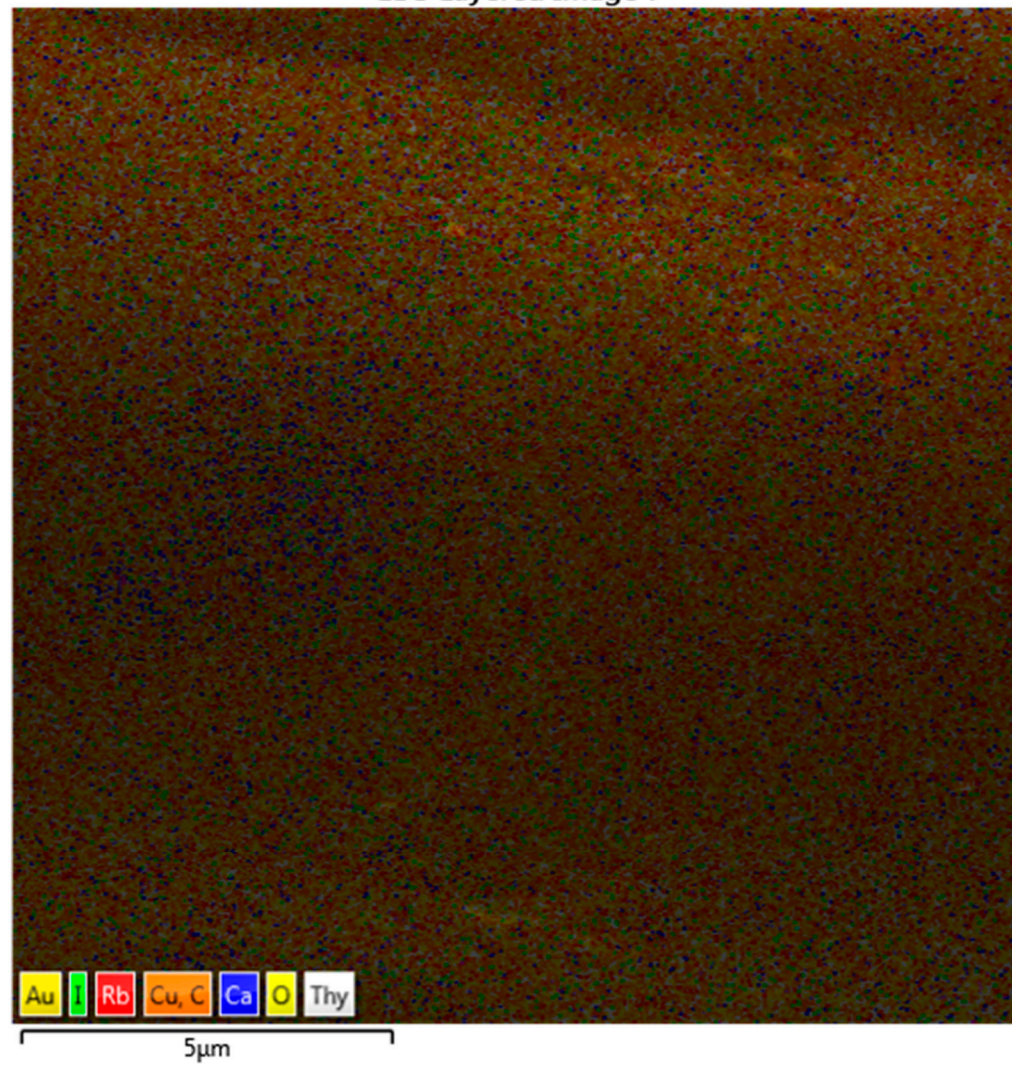

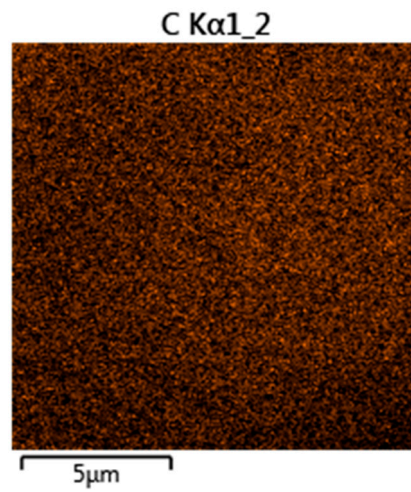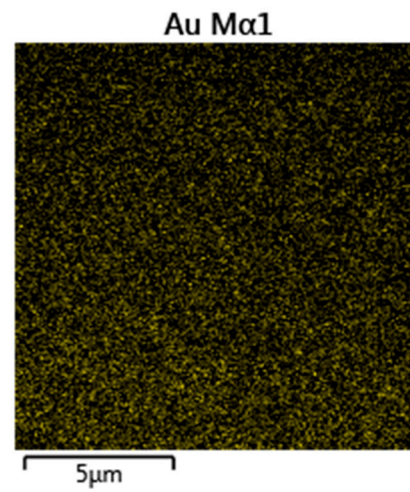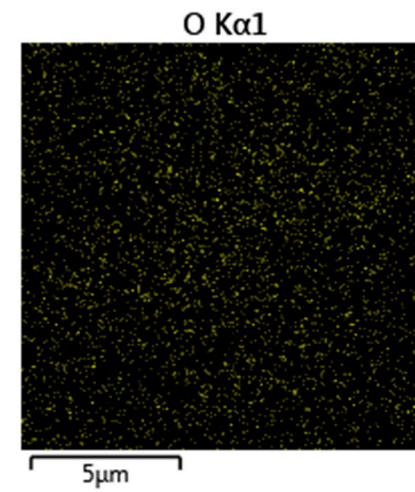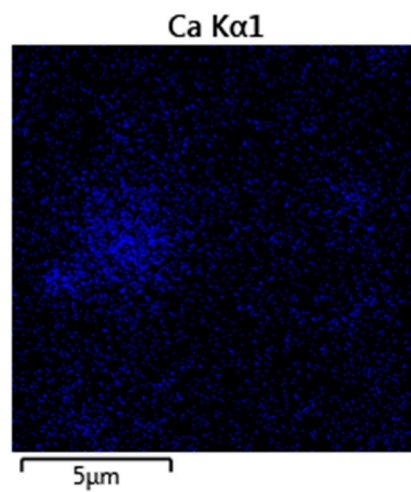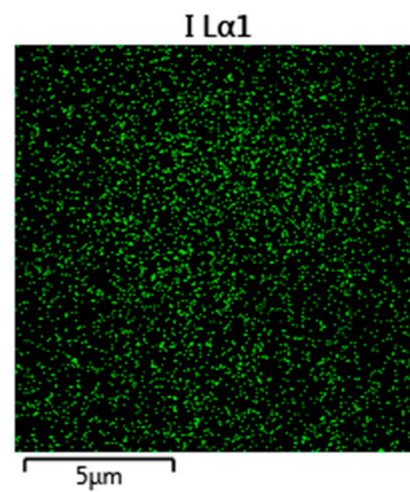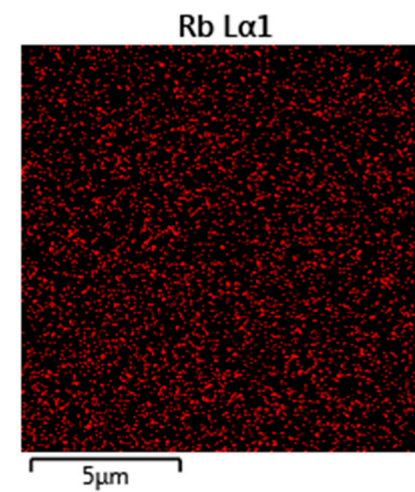

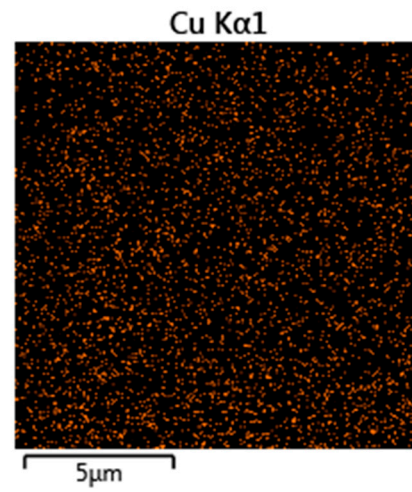

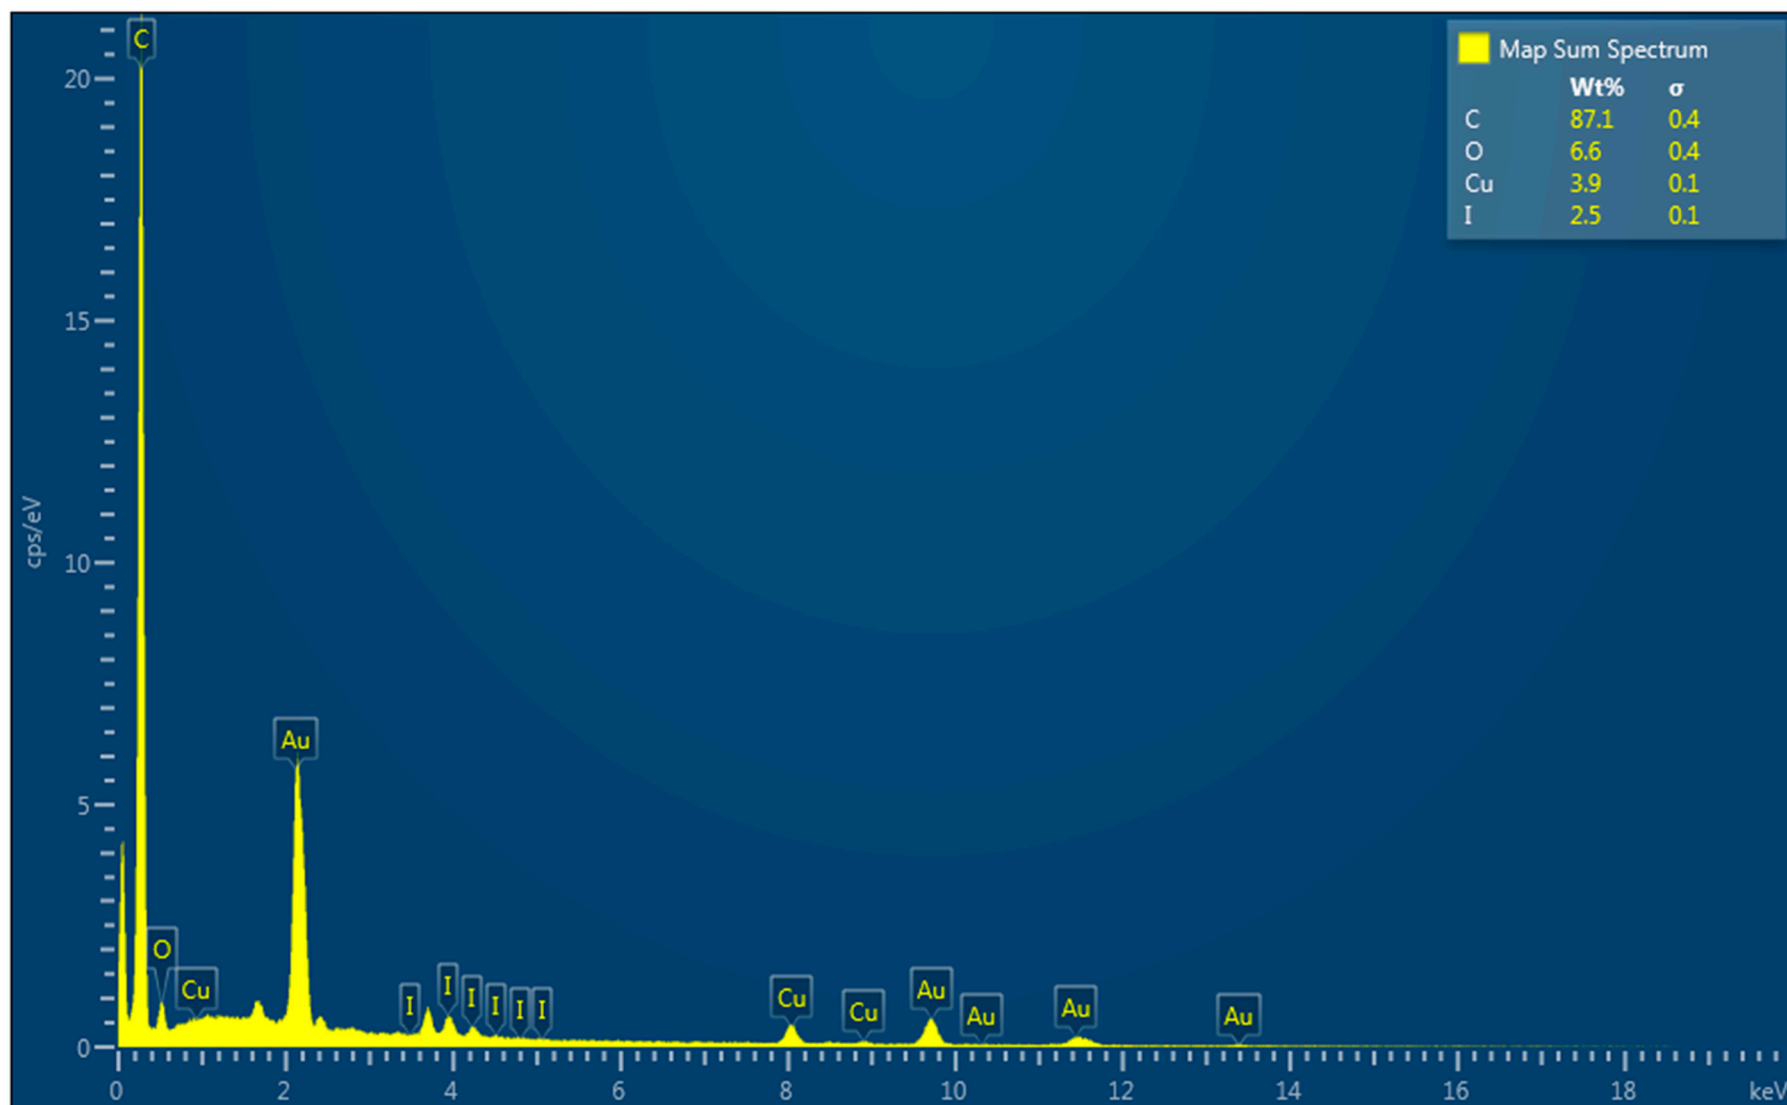

Supplement: s1 [file s1]

EDS Layered Image 5

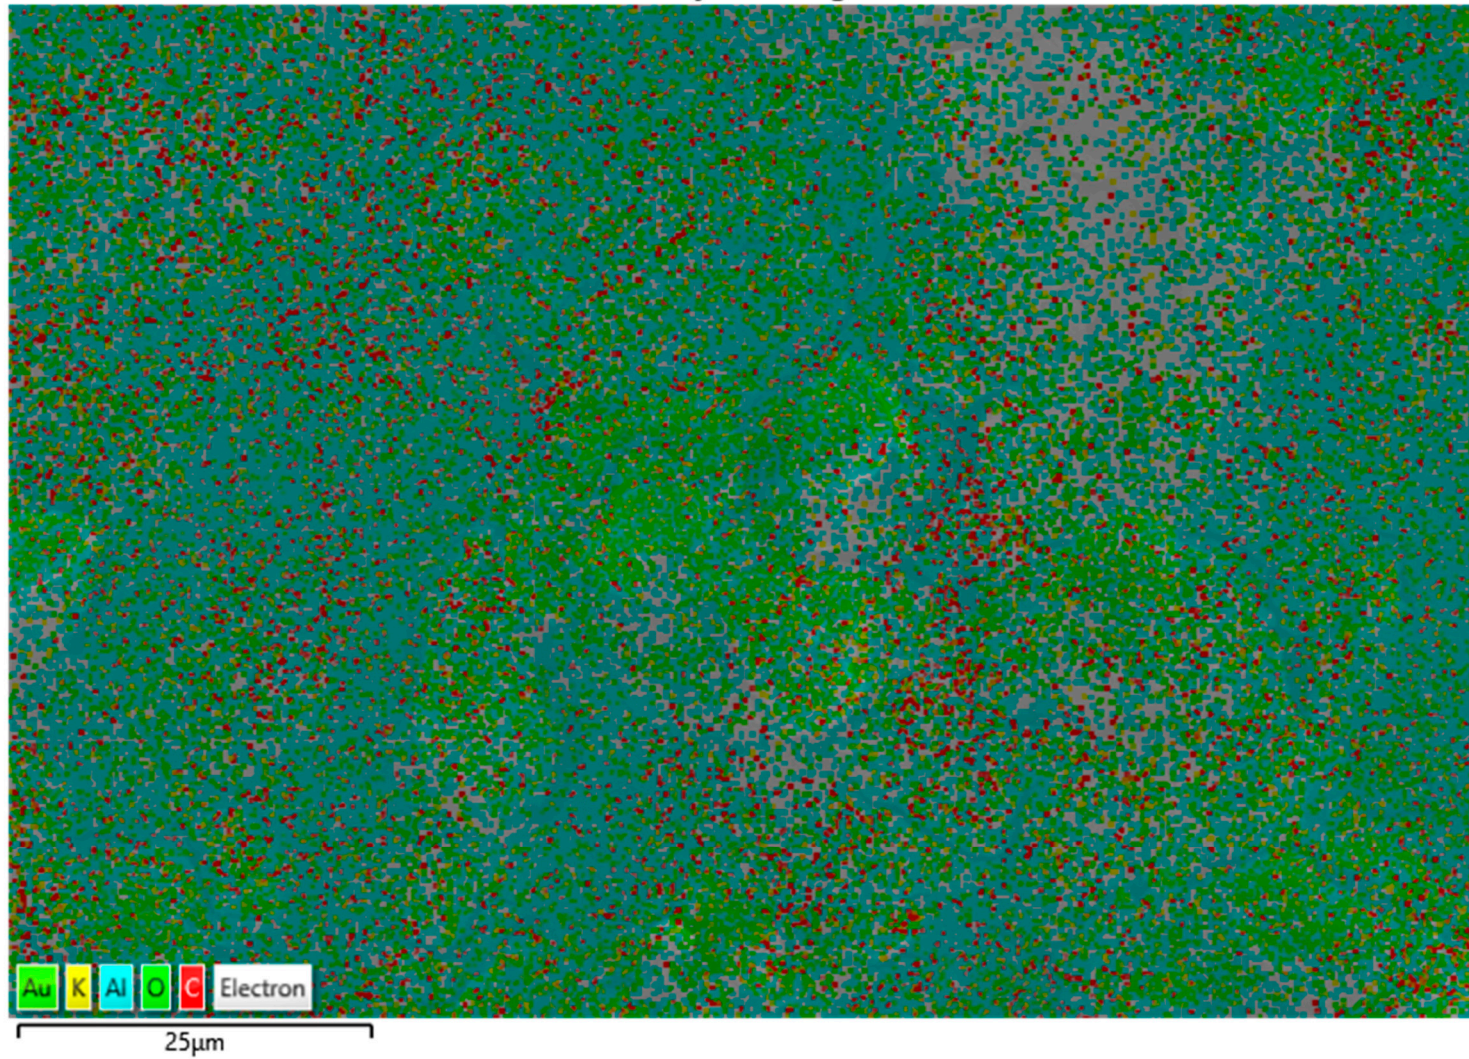

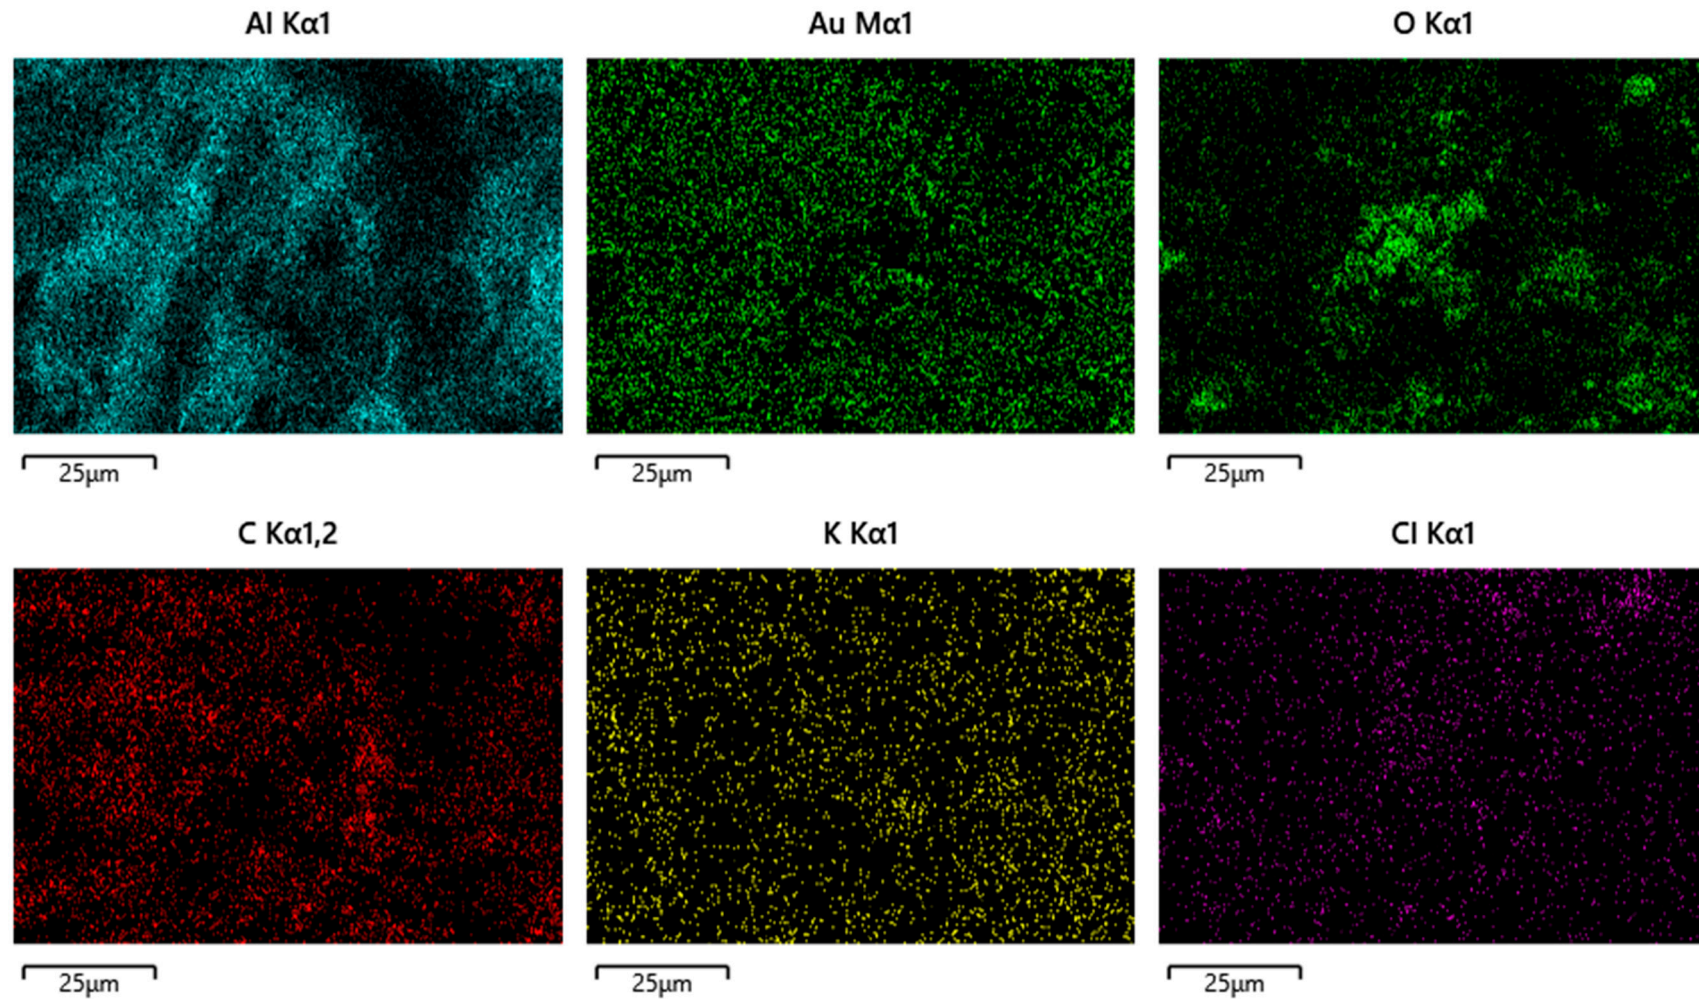



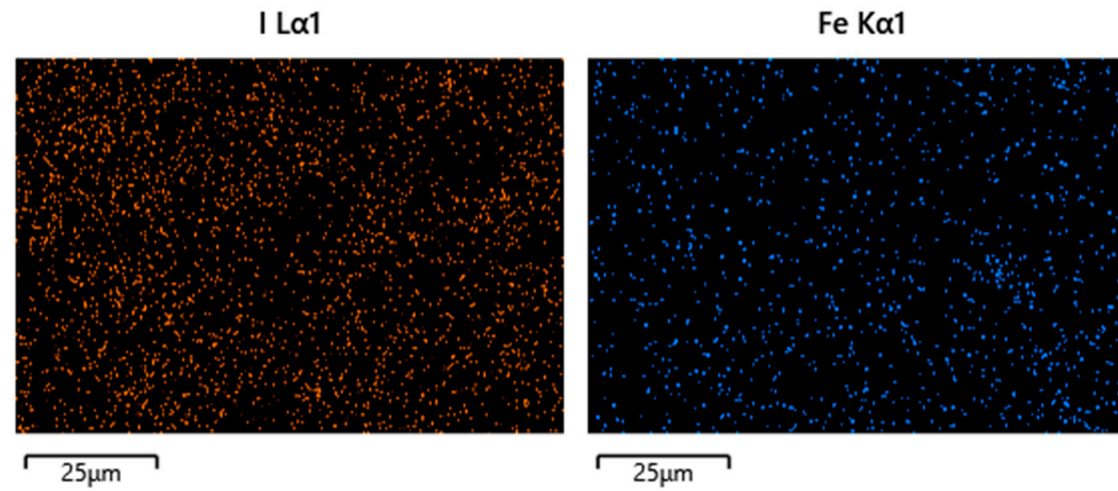

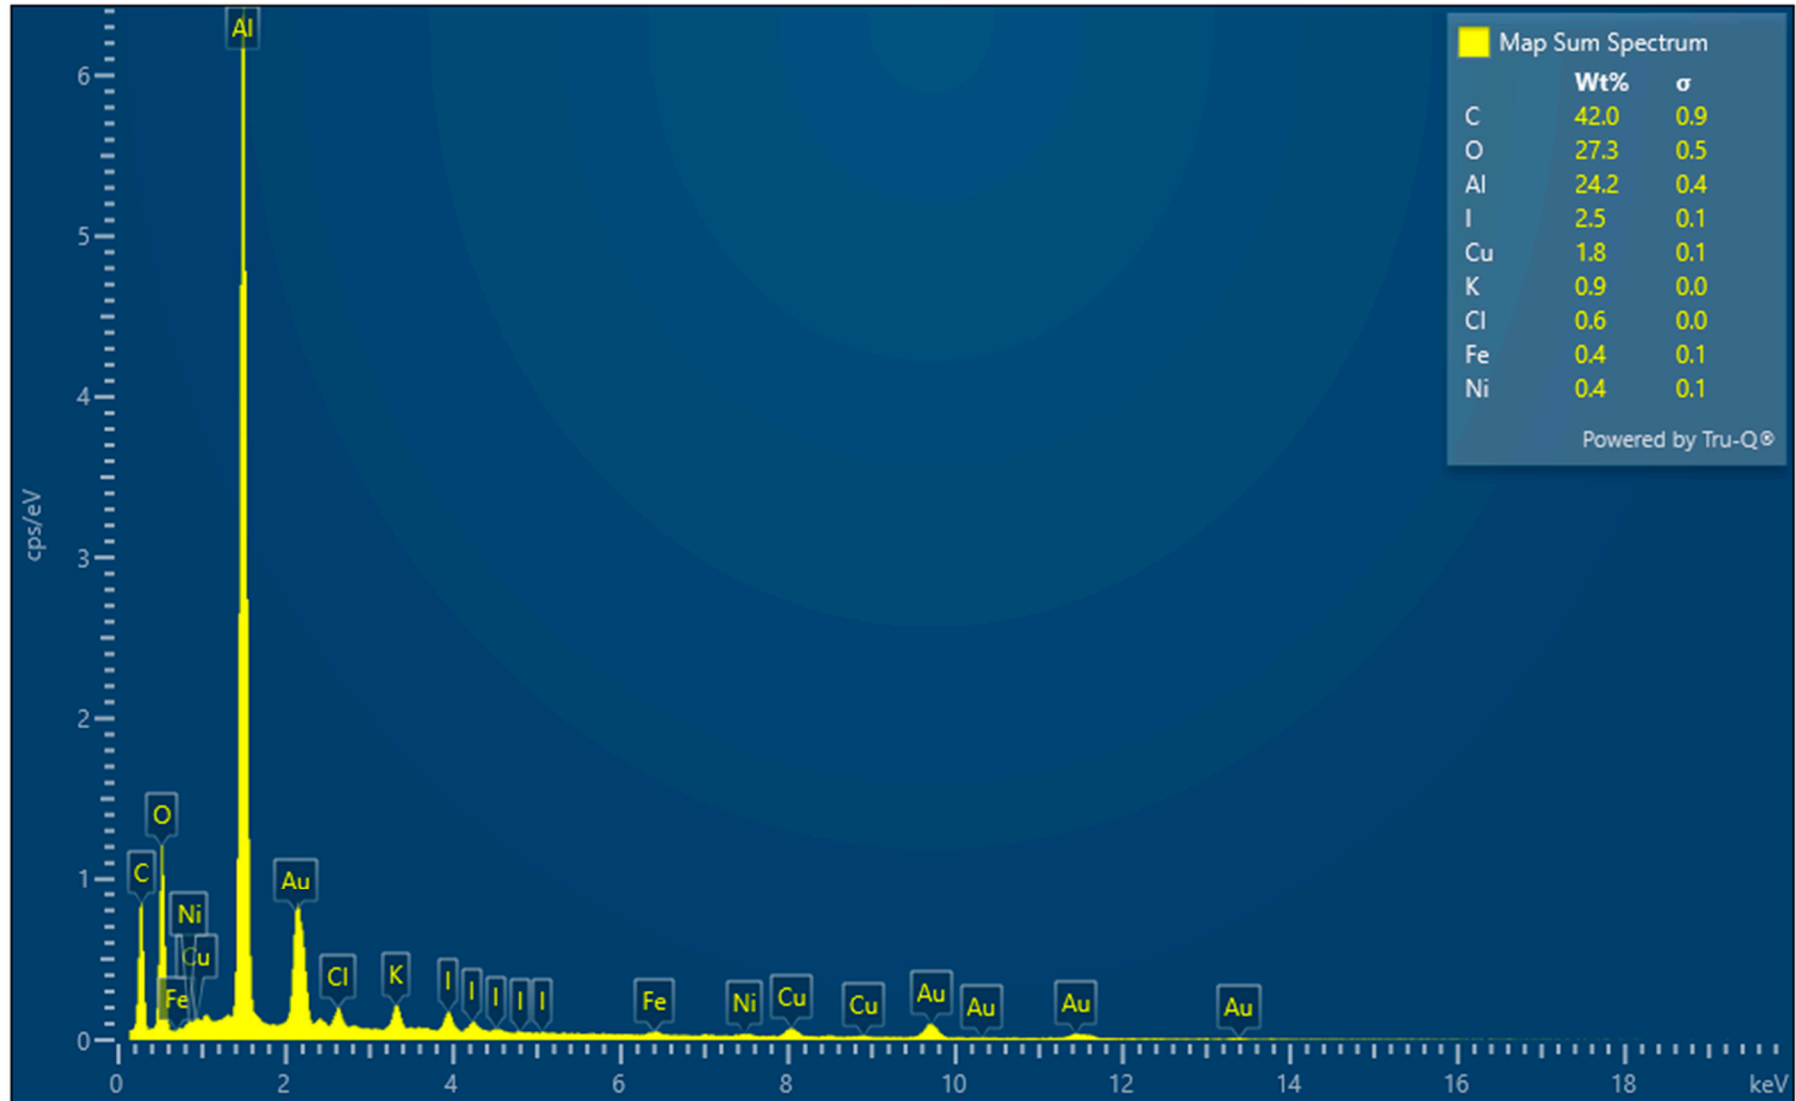

Supplement: s1 [file s1]

EDS Layered Image 9

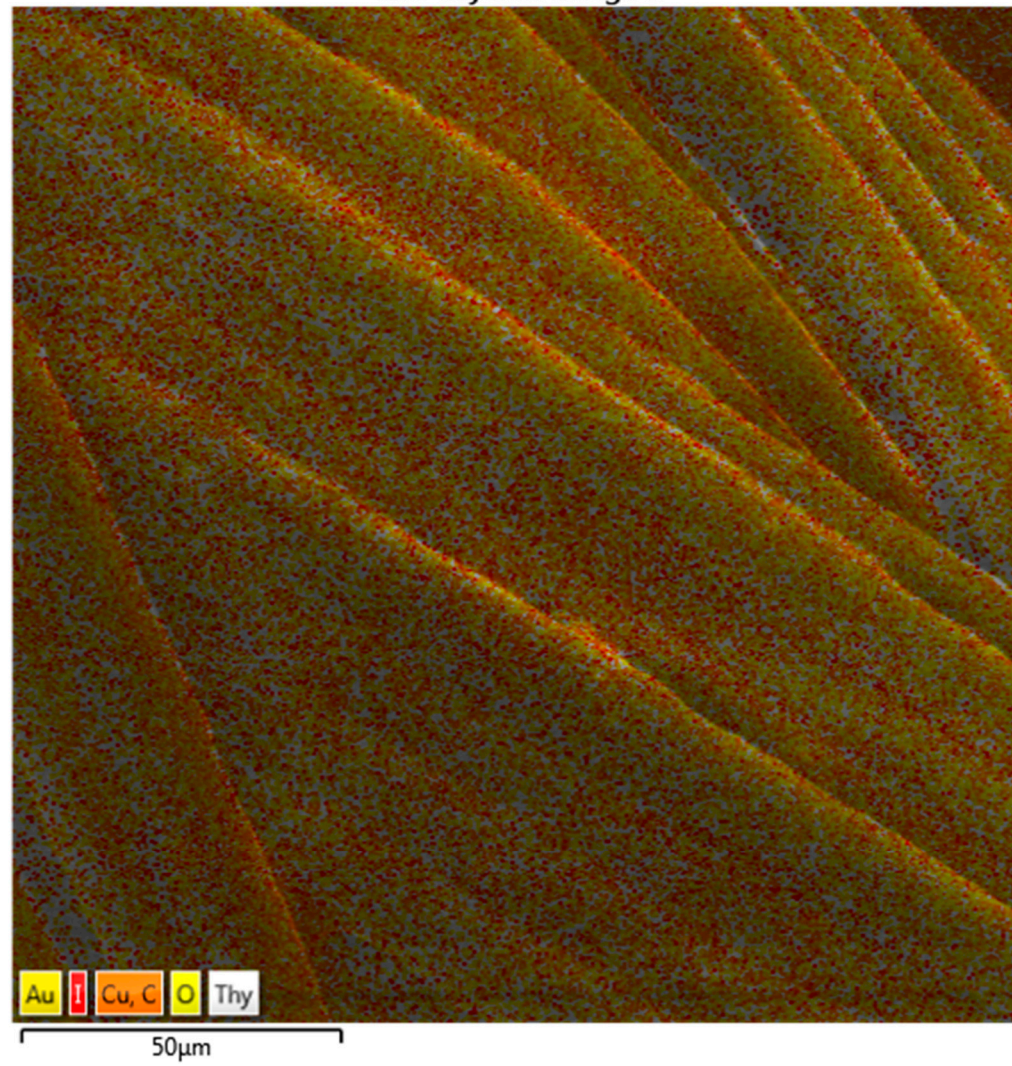

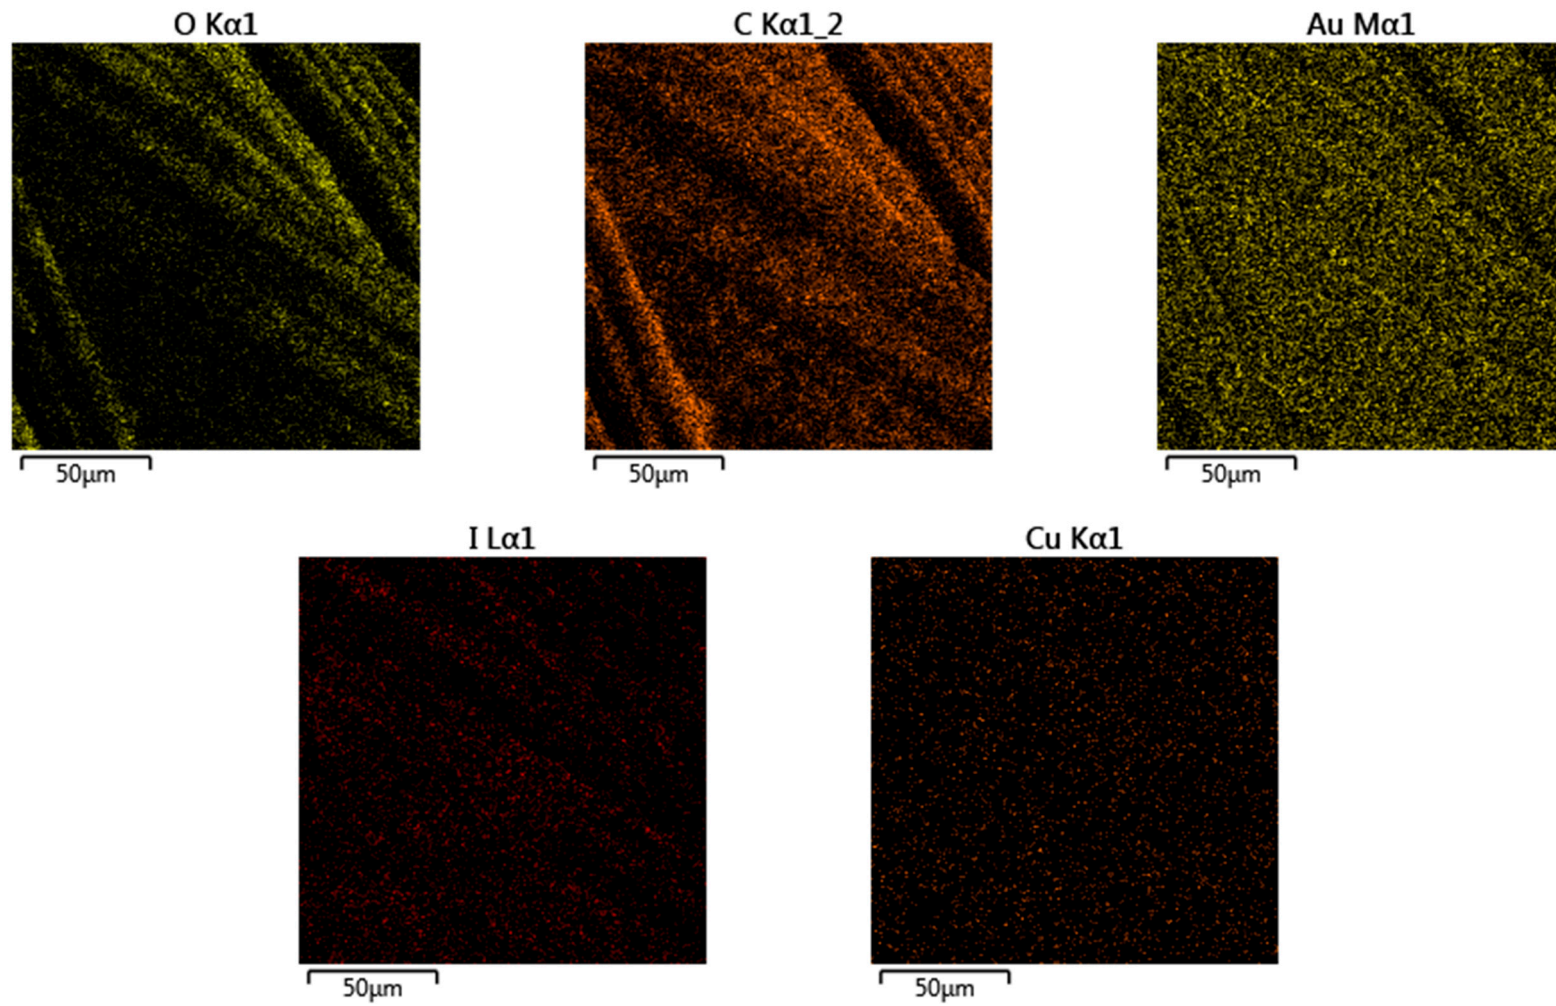

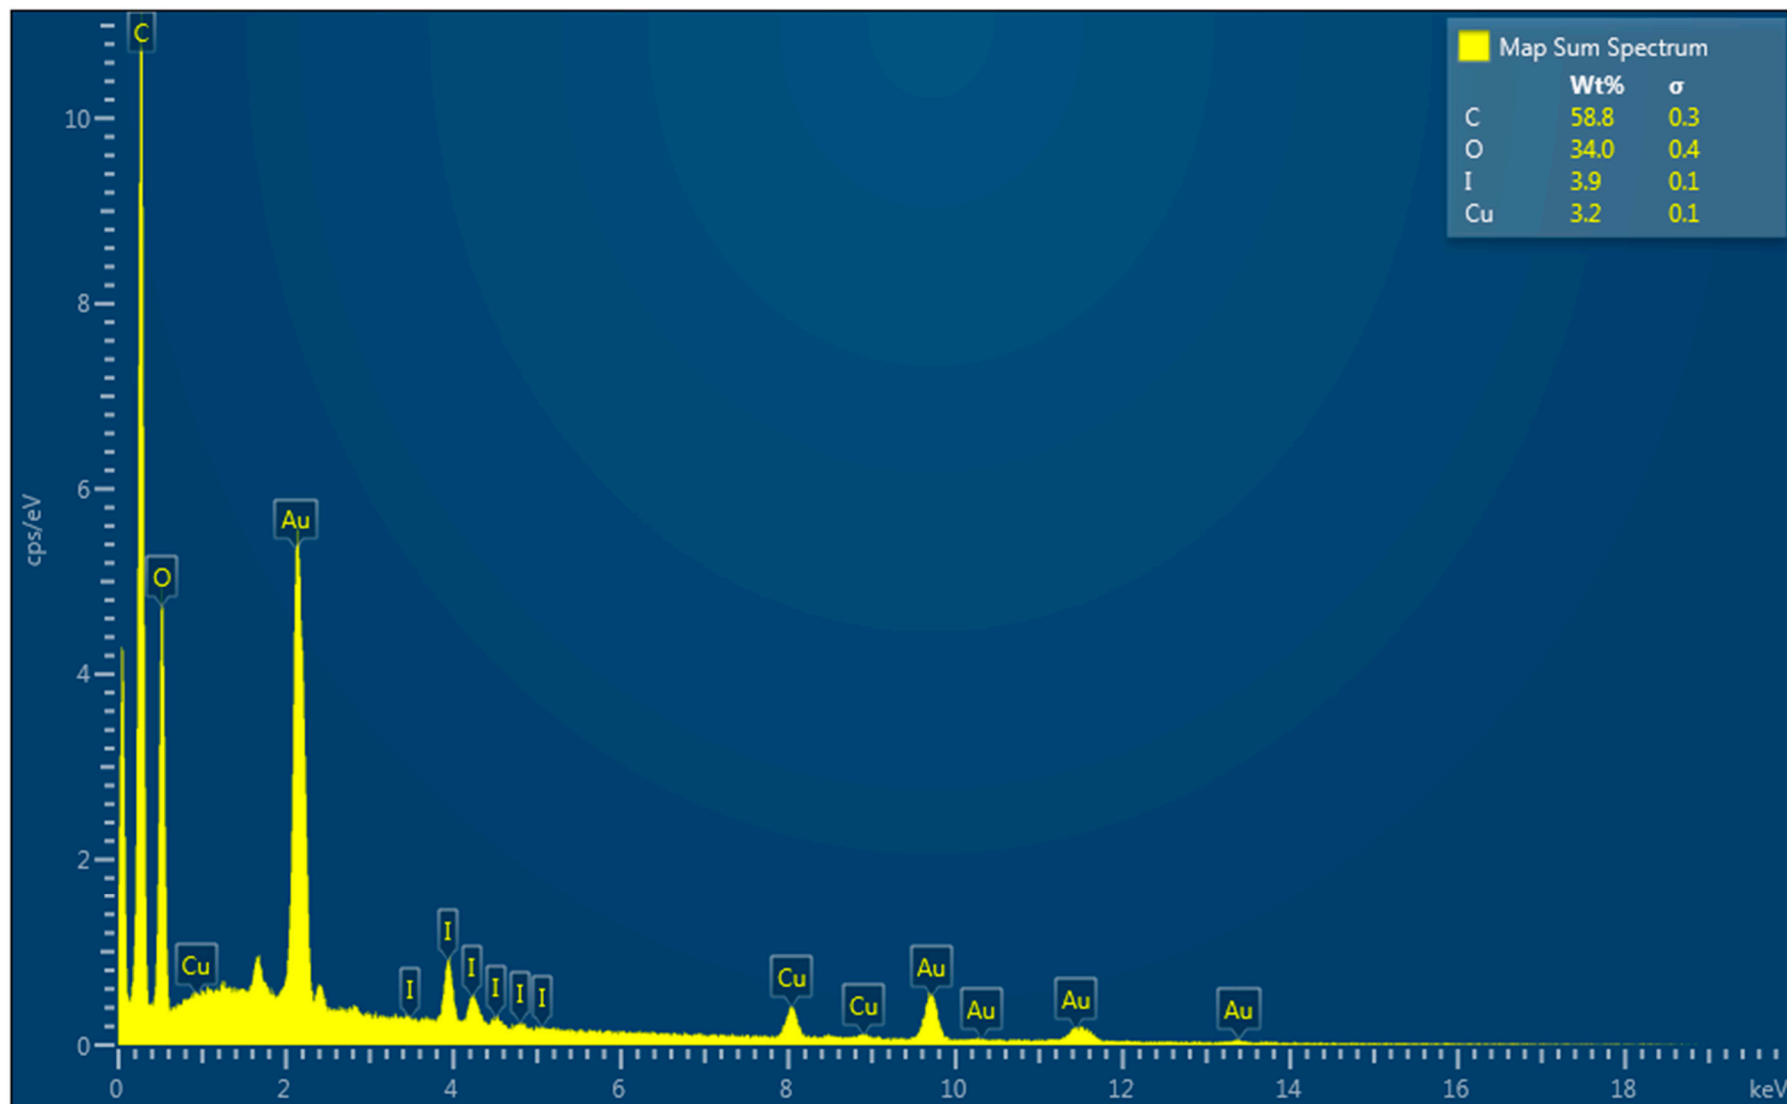

Supplement: s1 [file s1]
